# Supplementary material
Source: MDPI journal article supplement (https://www.mdpi.com/2073-4360/7/1/134)
Supplement: s1 [file s1]

## Supporting Information

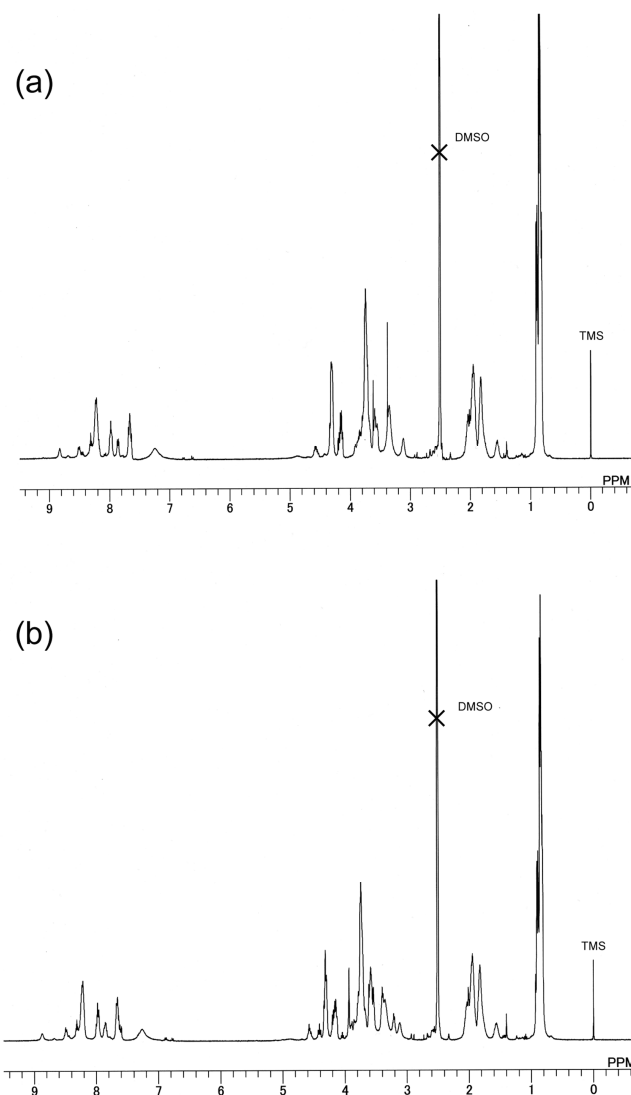

**Figure S1.**  $^1\text{H}$ -NMR spectra of the RGDS-ELP (a) and RGDS-*deg*-ELP (b) in  $d_6$ -DMSO (TMS) at 20 °C.

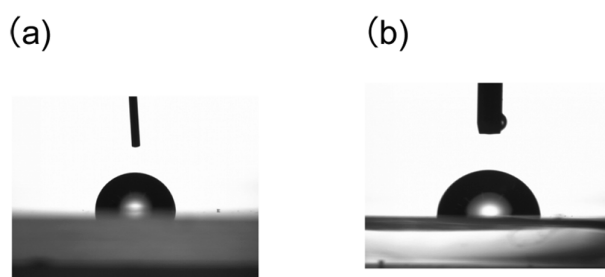

**Figure S2.** Water contact angles of the (a) RGDS-ELP-covered PSt-dish and (b) RGDS-*deg*-ELP-covered PSt-dish.

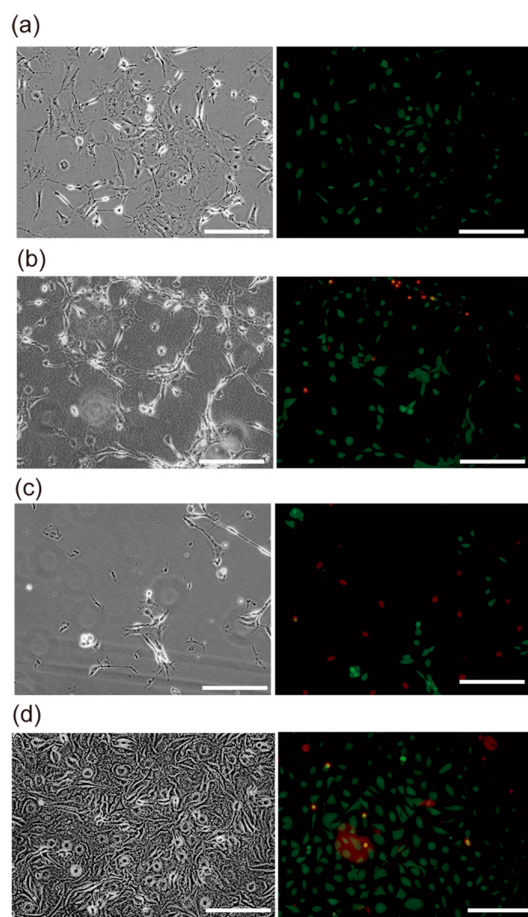

**Figure S3.** The live/dead cell assay of NIH/3T3 cells ( $1.0 \times 10^4$  cells  $\text{cm}^{-2}$ ) cultured for 24 h on RGDS-*deg*-ELP-covered PSt-dish (a), RGDS-ELP-covered PSt-dish (b), bare PSt-dish (c) and tissue culture dish (Biocoat™ Fibronectin Cellware) (d). Left pictures: phase-contrast images, right pictures: merged fluorescence images. Calcein stain (green) identifies live cell, while EthD stain (red) identifies dead cells. Scale bar: 200  $\mu\text{m}$ .

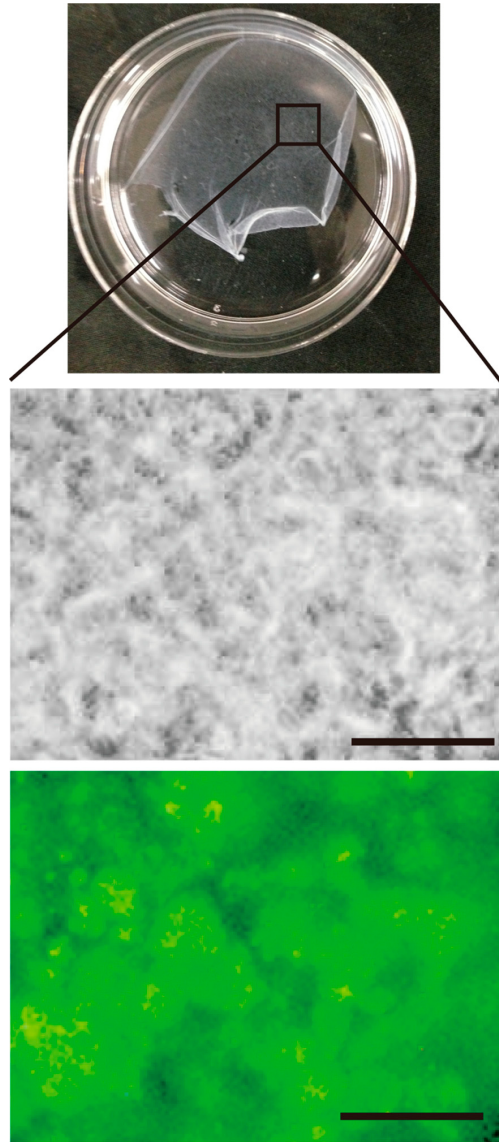

**Figure S4.** Phase-contrast and fluorescence images of the cell-sheet prepared on RGDS-ELP-covered PSt-dish. Calcein stain in fluorescence image (bottom) identifies live cell. Scale bar: 50  $\mu\text{m}$ .
