# Supplementary material
Source: MDPI journal article supplement (https://www.mdpi.com/2073-4360/7/1/134)
Supplement: s2 [file s2]

Supporting Information


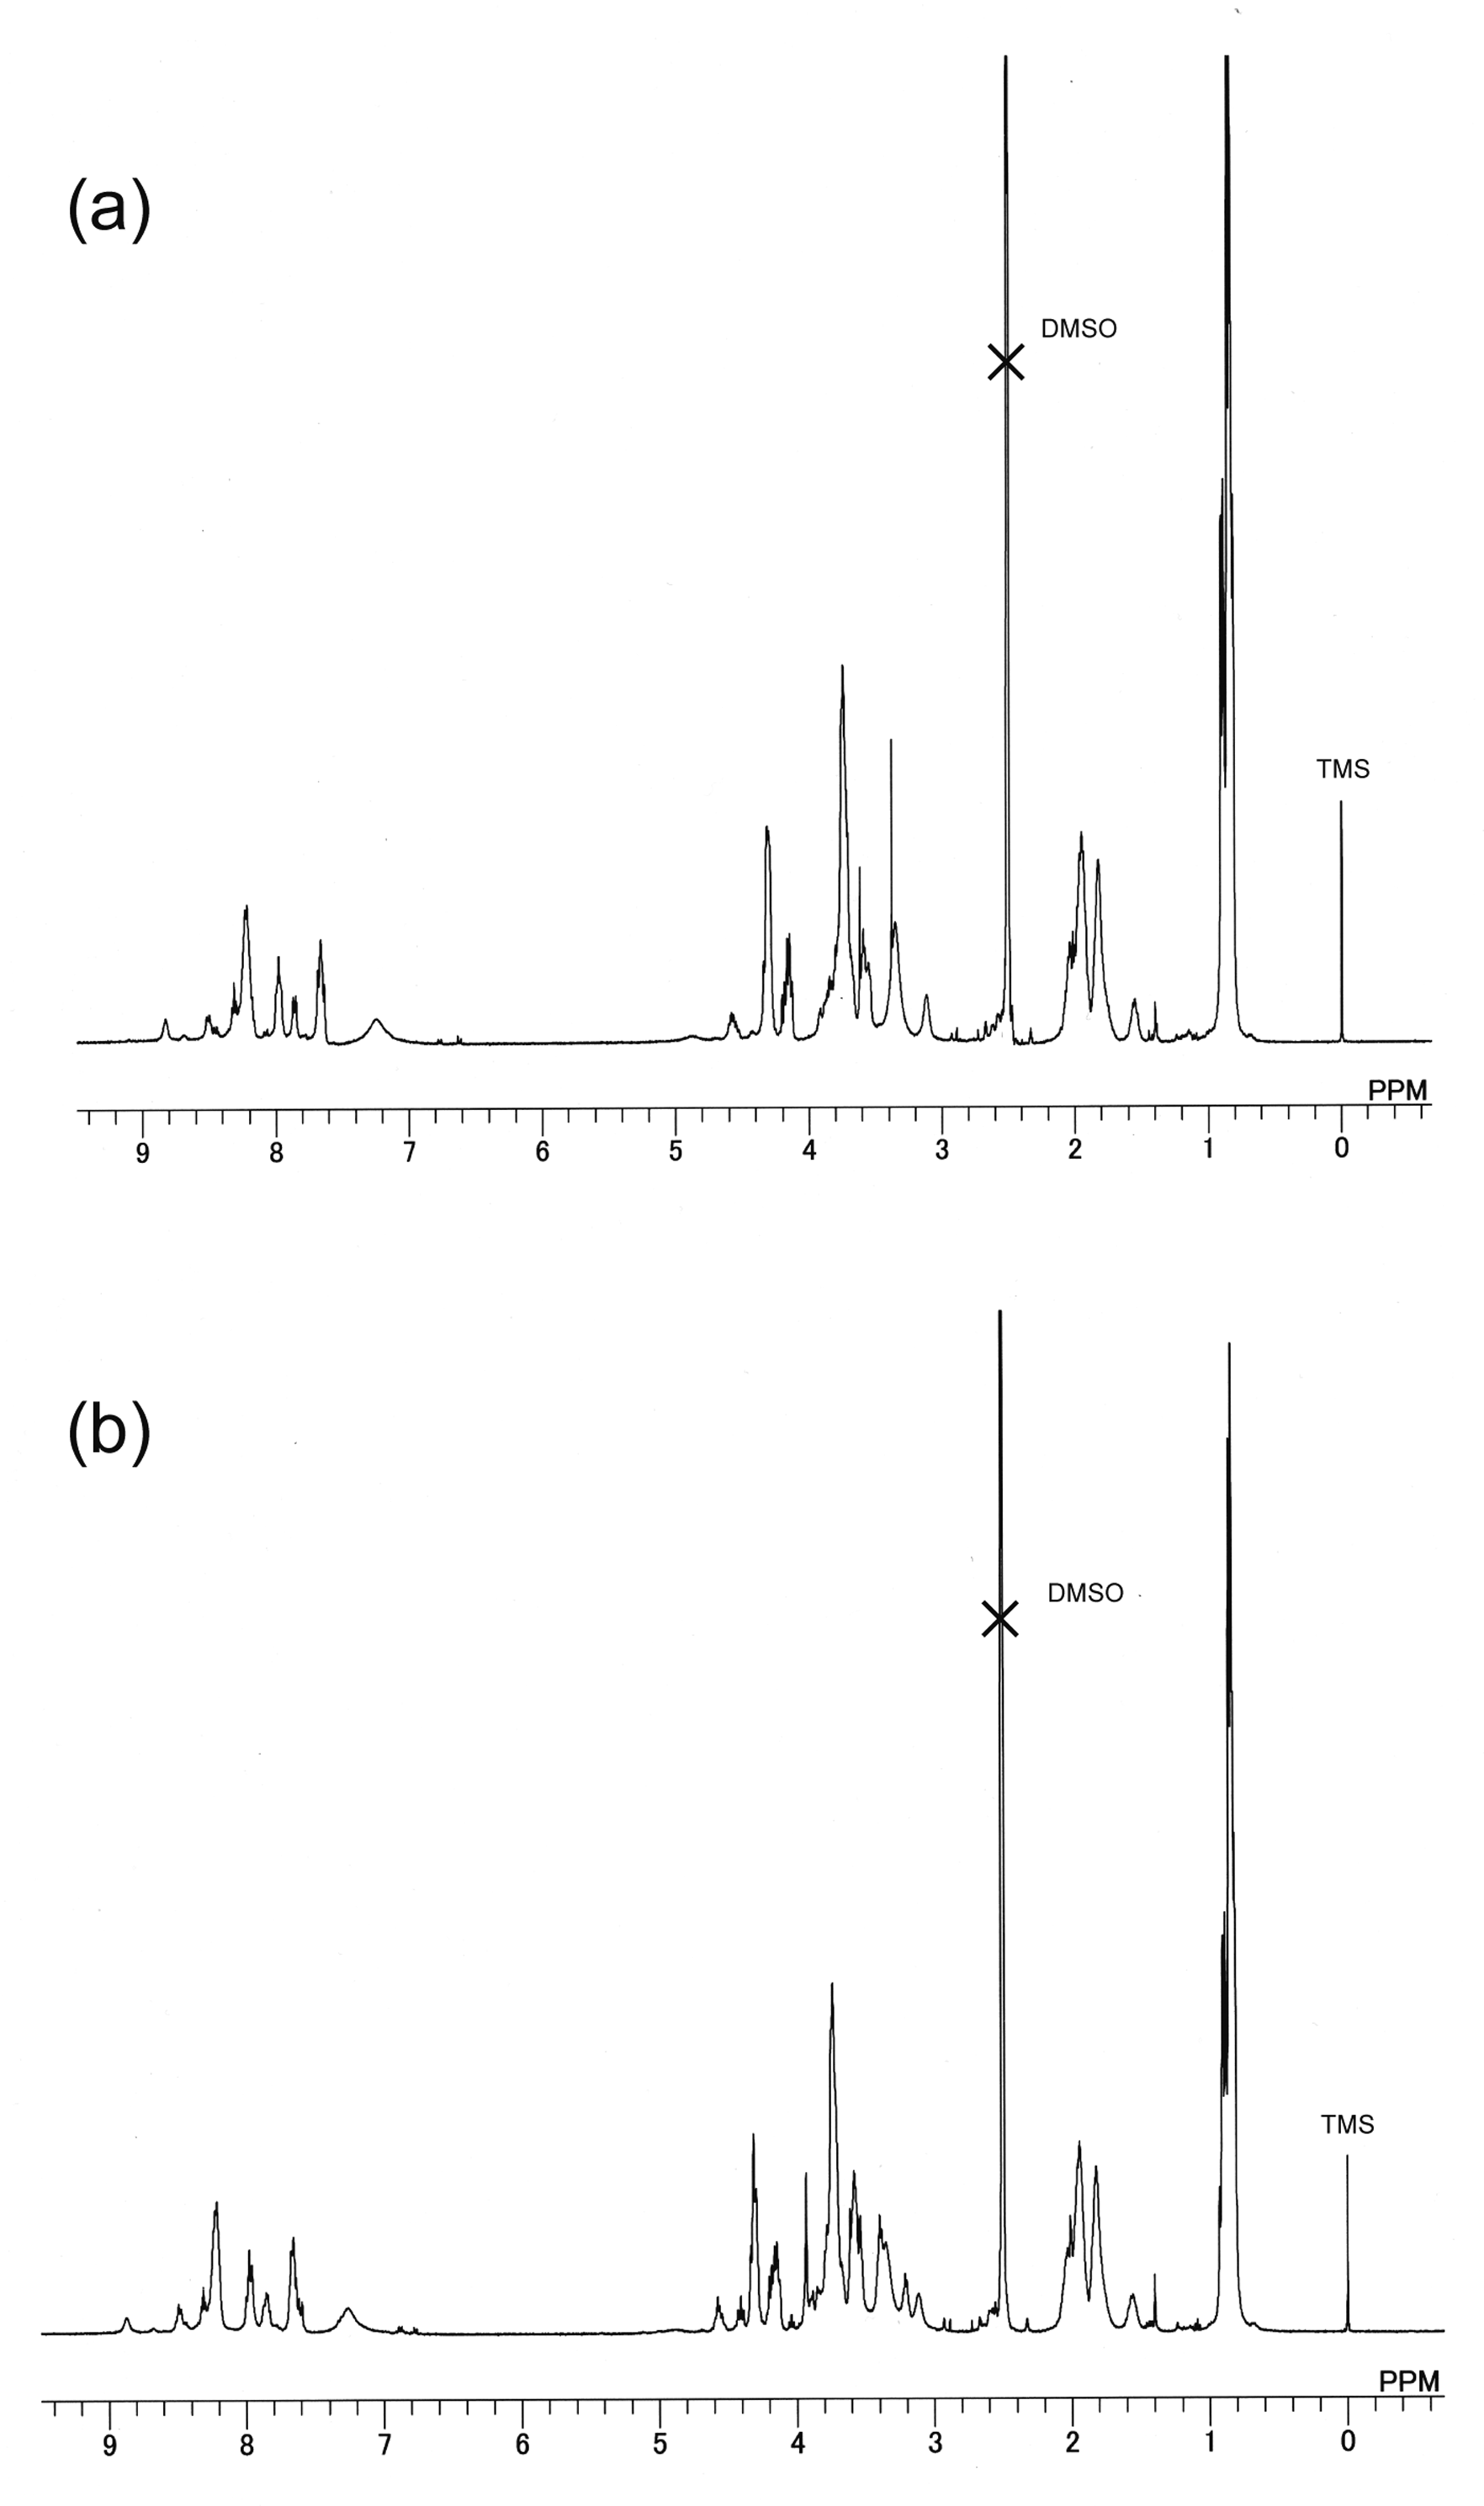


**Figure S1.** 1H-NMR spectra of the RGDS-ELP (**a**) and RGDS-*deg*-ELP (**b**) in *d*6-DMSO (TMS) at 20 °C.


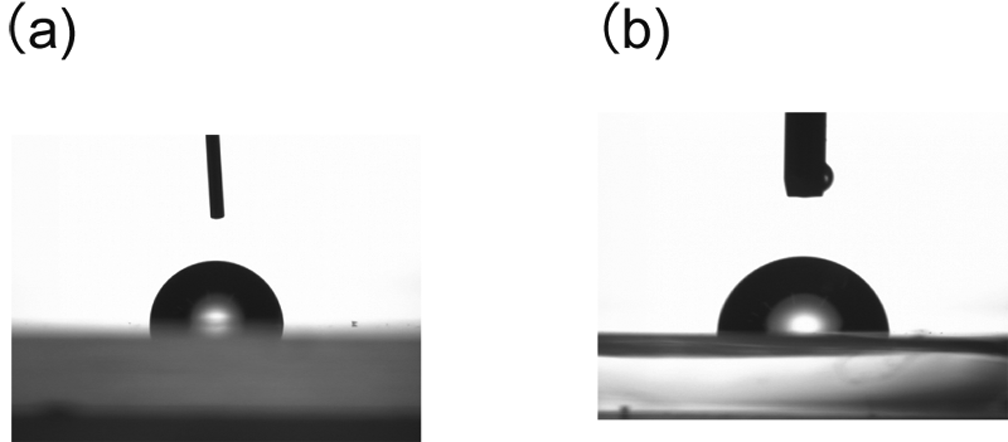


**Figure S2.** Water contact angles of the (**a**) RGDS-ELP-covered PSt-dish and
(**b**) RGDS-*deg*-ELP-covered PSt-dish.


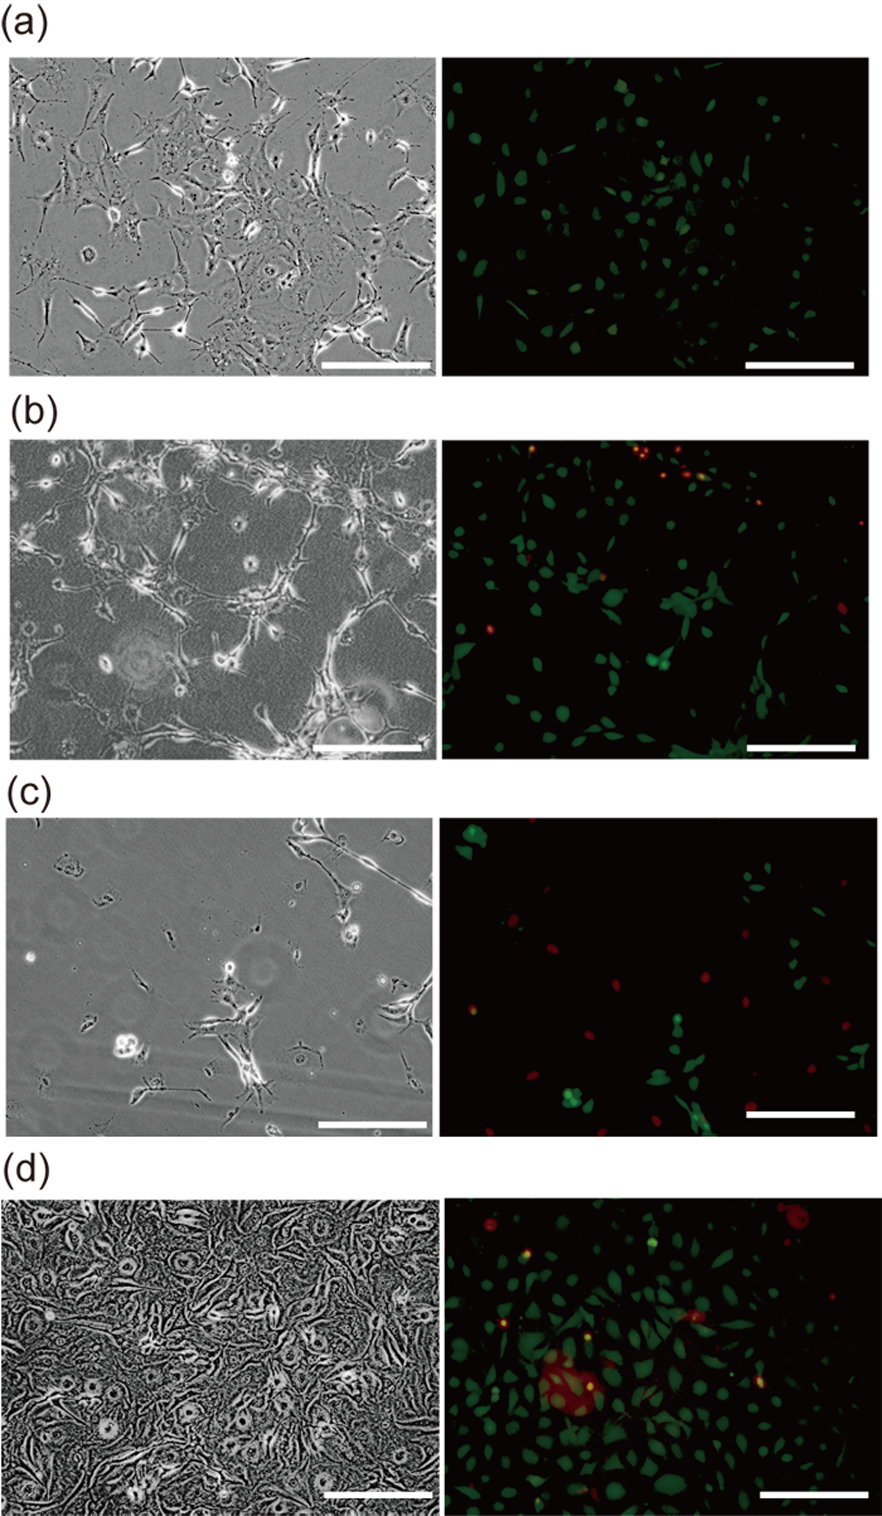


**Figure S3.** The live/dead cell assay of NIH/3T3 cells (1.0 × 104 cells cm−2) cultured for 24 h on RGDS-*deg*-ELP-covered PSt-dish (**a**), RGDS-ELP-covered PSt-dish (**b**), bare PSt-dish (**c**) and tissue culture dish (BiocoatTM Fibronectin Cellware) (**d**). Left pictures: phase-contarast images, right pictures: merged fluorescence images. Calcein stain (green) identifies live cell, while EthD stain (red) identifies dead cells. Scale bar: 200 μm.


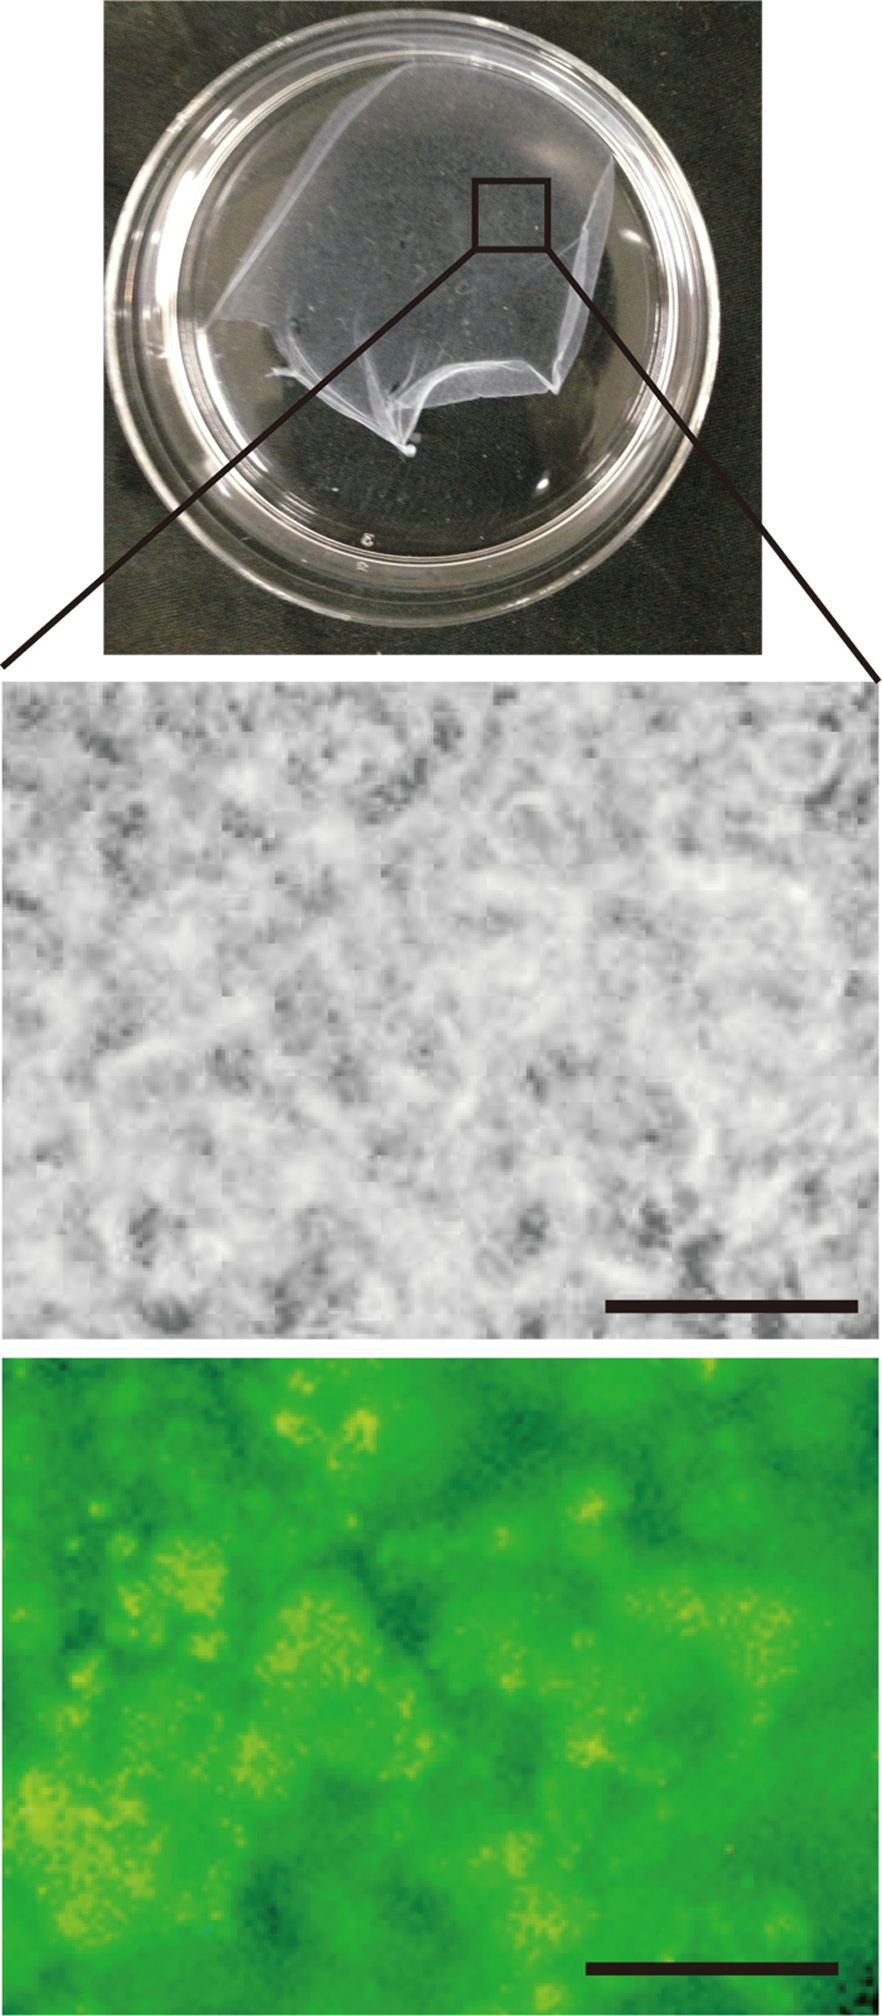


**Figure S4.** Phase-contrast and fluorescence images of the cell-sheet prepared on RGDS-ELP-covered PSt-dish. Calcein stain in fluorescence image (bottom) identifies live cell. Scale bar: 50 μm.
